# Supplementary material
Source: MDPI journal article supplement (https://www.mdpi.com/2077-0472/12/5/686)
Supplement: s1 [file s1]

Table S1 | Clean-reads in BSA pools

| #Sample_ID                                 | Total_Reads | Total_Bases | Total_Reads_with_Ns | N_Reads% | A%    | T%    | C%    | G%    | N% | Error% | Q20%  | Q30%  | GC%   |
|--------------------------------------------|-------------|-------------|---------------------|----------|-------|-------|-------|-------|----|--------|-------|-------|-------|
| The CK (Weilyu11) pool                     | 196869736   | 29231893396 | 63942               | 0.03     | 33.07 | 32.65 | 17.18 | 17.1  | 0  | 0.0416 | 97.58 | 92.02 | 34.28 |
| Male sterile plants in M <sub>3</sub> pool | 213597502   | 31776404012 | 68853               | 0.03     | 32.94 | 32.31 | 17.4  | 17.34 | 0  | 0.0403 | 97.86 | 92.97 | 34.74 |
| Male sterile plants in M <sub>4</sub> pool | 193903636   | 28835330095 | 61414               | 0.03     | 32.94 | 32.4  | 17.36 | 17.3  | 0  | 0.0404 | 97.86 | 92.91 | 34.66 |
| Fertile pool in M4 pool                    | 200865064   | 29766030004 | 80806               | 0.04     | 33.28 | 32.61 | 17.05 | 17.05 | 0  | 0.042  | 91.41 | 91.84 | 34.11 |

**Table S2.** The list of primers used in this study.

| Primer               | Sequence (5'to3')                | Purpose                        | Products (bp) | Primer                | Sequence (5'to3')        | Purpose                        | Products (bp) |
|----------------------|----------------------------------|--------------------------------|---------------|-----------------------|--------------------------|--------------------------------|---------------|
| <i>EVM0013050</i> 1F | GCCGGAATTCCACTGCCTAT             | Quantitative Real time RT-qPCR | 162           | <i>EVM0030179</i> 7F  | TCTCCAAAGAGGCCGCTAC      | Quantitative Real time RT-qPCR | 187           |
| <i>EVM0013050</i> 1R | TTCCTCAACAGCTTCTCCCC             | Quantitative Real time RT-qPCR |               | <i>EVM0030179</i> 7R  | GCCAGTTGAGTCTTCCATGGTT   | Quantitative Real time RT-qPCR |               |
| <i>EVM0001741</i> 2F | GTAAACACGCTCGCTCGGTC             | Quantitative Real time RT-qPCR | 175           | <i>EVM0000114</i> 8F  | GGGTATGACAGACCGAGCAA     | Quantitative Real time RT-qPCR | 155           |
| <i>EVM0001741</i> 2R | GTGGAAAACAATATTTGATC             | Quantitative Real time RT-qPCR |               | <i>EVM0000114</i> 8R  | ATGCCCATGTCAGTAGACCC     | Quantitative Real time RT-qPCR |               |
| <i>EVM0018917</i> 3F | GCGGTACCATGGCGATTCCGATGA         | Quantitative Real time RT-qPCR | 149           | <i>EVM0029279</i> 9F  | CGGTTCCAAACCCGTAACA      | Quantitative Real time RT-qPCR | 152           |
| <i>EVM0018917</i> 3R | CAGGTCGACTCAGTCAAGTTGCCTA        | Quantitative Real time RT-qPCR |               | <i>EVM0029279</i> 9R  | ACTGGATTCCCTGCGTGTATG    | Quantitative Real time RT-qPCR |               |
| <i>EVM0017094</i> 4F | CCGGGGCGGTACCATGGCTATTGCA        | Quantitative Real time RT-qPCR | 169           | <i>EVM0019079</i> 10F | AAGAGCAATGTCATCGACGCA    | Quantitative Real time RT-qPCR | 177           |
| <i>EVM0017094</i> 4R | CAGTGGTCTCACCTGCAGGTCTAGTTTCT    | Quantitative Real time RT-qPCR |               | <i>EVM0019079</i> 10R | AGCCTCATATGTTCCATCTTCCAA | Quantitative Real time RT-qPCR |               |
| <i>EVM0018917</i> 5F | CAGTGGTCTCAGCCCGGGCTCTGTAACATATC | Quantitative Real time RT-qPCR | 153           | <i>EVM0026892</i> 11F | GTTTTCCAAGGCACAAGGTGT    | Quantitative Real time RT-qPCR | 172           |
| <i>EVM0018917</i> 5R | CTCAGGGCTGTCATGGTACTCTGTCCAC     | Quantitative Real time RT-qPCR |               | <i>EVM0026892</i> 11R | GGGATCATCGGGGACGAGA      | Quantitative Real time RT-qPCR |               |
| <i>EVM0031043</i> 6F | CTCATACAGTTTATGAAAAATATAAAATT    | Quantitative Real time RT-qPCR | 161           | <i>EVM0004172</i> 12F | TCTTCGGAACCGACCACTTG     | Quantitative Real time RT-qPCR | 149           |
| <i>EVM0031043</i> 6R | ATGGAGAACTCGAGTCAAATCT           | Quantitative Real time RT-qPCR |               | <i>EVM0004172</i> 12R | TCAGCAATATGATTGAGACGGC   | Quantitative Real time RT-qPCR |               |
| <i>Tubulin</i> -R    | TTCTTTATGGTTGGGTTTGC             | Quantitative Real time RT-qPCR | 192           |                       |                          |                                |               |
| <i>Tubulin</i> -F    | GCTCGTCTACCTCCTTTGTG             | Quantitative Real time RT-qPCR |               |                       |                          |                                |               |

F: forward primers; R: reverse primers. Primers were designed by NCBI, and tested by RCR of Tubulin.

Table S3 | The significant PPI between EVM0001741 and six seed development related genes.

| Gene1      | Arabidopsis<br>homologs | Gene2 ID   | Arabidopsi<br>s homologs | score |
|------------|-------------------------|------------|--------------------------|-------|
| EVM0001741 | AT1G77390               | EVM0030179 | AT5G67260                | 0.77  |
| EVM0001741 | AT1G77390               | EVM0000114 | AT3G15030                | 0.40  |
| EVM0001741 | AT1G77390               | EVM0029279 | AT4G31400                | 0.46  |
| EVM0001741 | AT1G77390               | EVM0019079 | AT5G48600                | 0.65  |
| EVM0001741 | AT1G77390               | EVM0026892 | AT5G22800                | 0.405 |
| EVM0001741 | AT1G77390               | EVM0004172 | AT5G05560                | 0.67  |
| EVM0004172 | AT5G05560               | EVM0026892 | AT5G22800                | 0.97  |

The critical score for protein-by-protein interaction was set at 0.40.

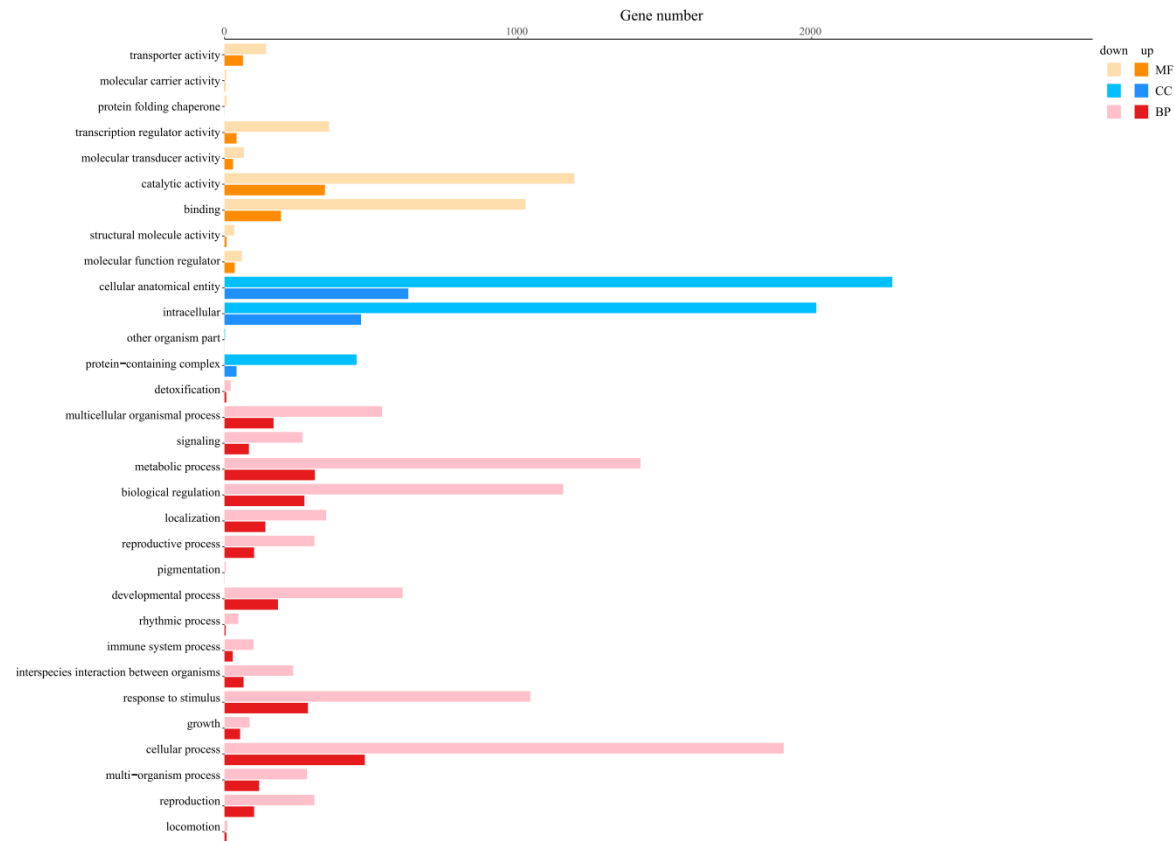

**Figure S1.** Gene ontology (GO) enrichment analysis for up- and down-regulated genes. The ordinate represents the detailed classification of GO term, and the abscissa represents the number of DEGs. MF(Molecular Function), BP (Biological Process) and CC (Cellular Component).

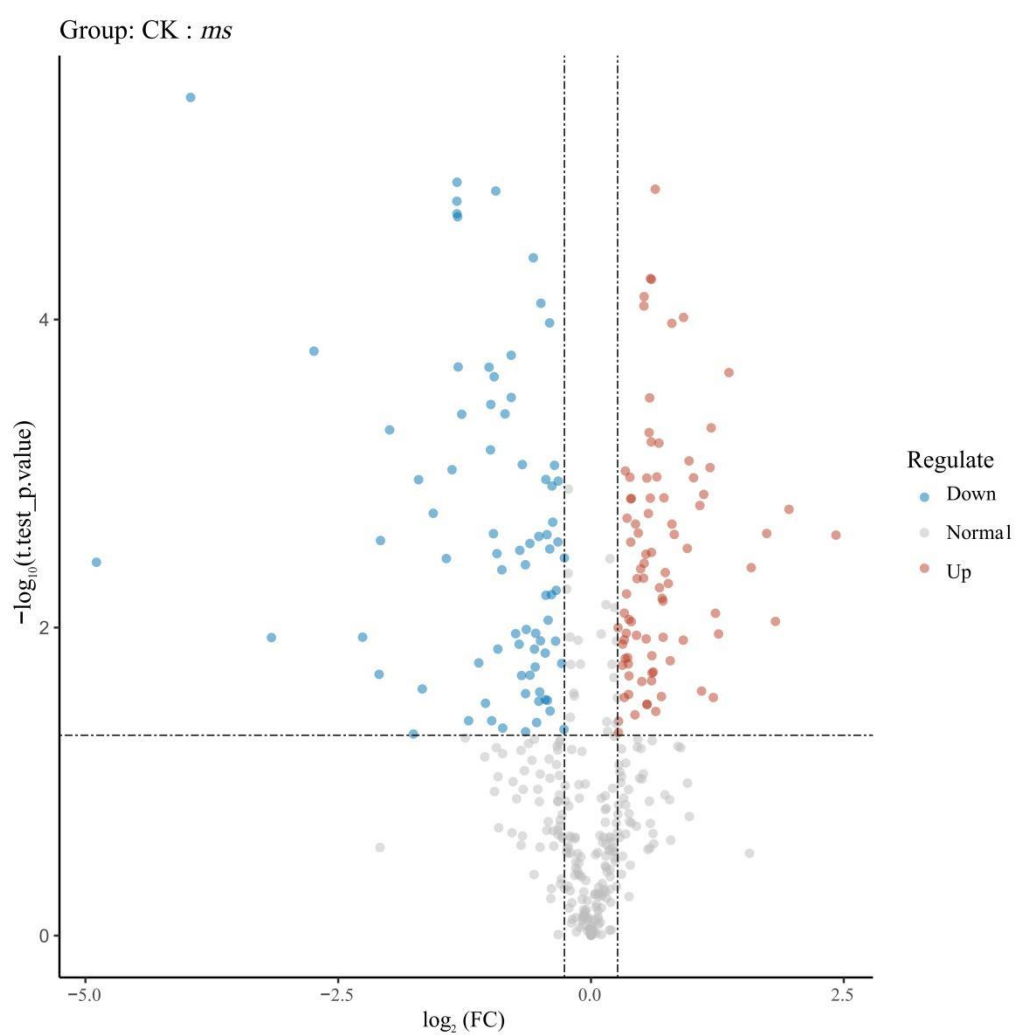

**Figure S2.** Volcano plots are using for visualizing differential metabolites between CK group and *ms* group. Pink and blue points represent the significant differential metabolites with  $p\text{-value} < 0.005$  and  $|\log_2\text{FC}| > 0.5$ .

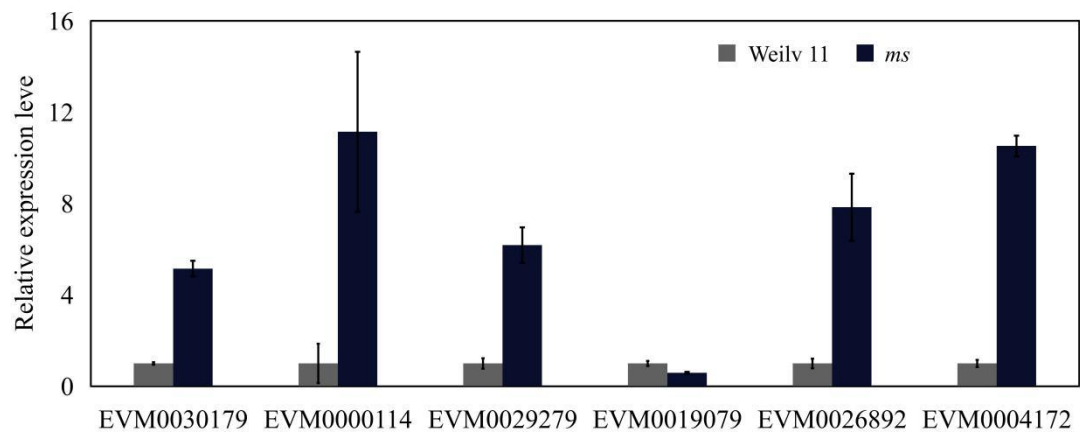

**Figure S3.** Real-time PCR analysis of six genes interaction with EVM0001741 in mungbean.
